# Supplementary material
Source: publisher site journal article supplement (https://www.dovepress.com/get_supplementary_file.php?f=372314.docx)
Supplement: Supplementary file 1 [file get_supplementary_file.php]

**Supplemental table 1** The primers for *PLCL1*gene amplification and sequencing.

| **Gene** | **SNP** | **1st-PCR primer** | **2nd-PCR primer** | **UEP-DIR** | **UEP-SEQ** |
| --- | --- | --- | --- | --- | --- |
| *PLCL1* | rs2139049 | ACGTTGGATGTAGCATGATGCCTCCAGCTT | ACGTTGGATGGTCAAGCTTCCATTGAATGTC | F | gCCAAAAAGGAGCCGGTATA |
|  | rs6738825 | ACGTTGGATGGGTTTAATCACATGTCTCTC | ACGTTGGATGACCAGTAGGTTTTCACAGTC | R | cccccGTCTGCTAGCACACAGACAGA |
|  | rs2164068 | ACGTTGGATGGGGCTTATCAATGTGTTTTG | ACGTTGGATGCTCTCCCTAAGCCCAATAAG | R | cccacGCAAGCTCCTTAATCAAAATT |
|  | rs2228135 | ACGTTGGATGGTAGGGAGCTCTCTGATTTG | ACGTTGGATGCATTTCCCAATAGTTTTGGC | R | agAGATAGTTCAAAATCCCTGTA |

SNP, single nucleotide polymorphism; UEP-DIR, Unique extension primer-direction; UEP-SEQ, Unique extension primer-sequencing.

**Supplemental table 2** The FPRP and statistical power values of all the positive results in this study.

| **SNP ID** | **Model** | **Genotype** | **OR (95%CI)** | ***p*** | **Statistical Power a (%)** | **Prior probability** | | |
| --- | --- | --- | --- | --- | --- | --- | --- | --- |
| **0.25** | **0.1** | **0.01** |
| **Overall analysis** |  |  |  |  |  |  |  |  |
| rs2139049 | Allele | A | 0.85 (0.73-0.98) | 0.031 | 100.00 | **0.070*** | **0.185*** | 0.714 |
|  | Codominant | AA | 0.44 (0.26-0.74) | 0.002 | 31.49 | **0.018*** | **0.053*** | 0.382 |
|  | Recessive | AA | 0.46 (0.27-0.76) | 0.002 | 37.24 | **0.019*** | **0.056*** | 0.393 |
|  | Log-additive | --- | 0.83 (0.71-0.97) | 0.021 | 100.00 | **0.054*** | **0.147*** | 0.654 |
| rs6738825 | Allele | G | 0.84 (0.73-0.98) | 0.022 | 100.0 | **0.074*** | **0.193*** | 0.725 |
|  | Codominant | GG | 0.44 (0.26-0.74) | 0.002 | 31.49 | **0.018*** | **0.053*** | 0.382 |
|  | Recessive | GG | 0.46 (0.27-0.76) | 0.002 | 37.24 | **0.019*** | **0.056*** | 0.393 |
|  | Log-additive | --- | 0.83 (0.71-0.97) | 0.023 | 100.00 | **0.054*** | **0.147*** | 0.654 |
| rs2164068 | Allele | A | 0.85 (0.73-0.98) | 0.030 | 100.00 | **0.070*** | **0.185*** | 0.714 |
|  | Codominant | AA | 0.46 (0.28-0.77) | 0.003 | 37.55 | **0.024*** | **0.070*** | 0.452 |
|  | Recessive | AA | 0.48 (0.29-0.80) | 0.003 | 43.78 | **0.032*** | **0.091*** | 0.524 |
|  | Log-additive | --- | 0.82 (0.70-0.96) | 0.015 | 100.00 | **0.039*** | **0.109*** | 0.574 |
| **Male** |  |  |  |  |  |  |  |  |
| rs2164068 | Codominant | AA | 0.11 (0.02-0.46) | 0.003 | 1.90 | 0.282 | 0.541 | 0.929 |
|  | Recessive | AA | 0.10 (0.02-0.46) | 0.0001 | 1.94 | 0.325 | 0.591 | 0.941 |
| rs2228135 | Codominant | GA | 1.41 (1.03-1.92) | 0.031 | 98.68 | **0.081*** | 0.210 | 0.745 |
|  | Dominant | GA-GG | 1.37 (1.02-1.85) | 0.035 | 99.32 | **0.108*** | 0.266 | 0.799 |
|  | Overdominant | GA | 1.36 (1.01-1.83) | 0.040 | 99.46 | **0.113*** | 0.277 | 0.808 |
| **> 43 years old** |  |  |  |  |  |  |  |  |
| rs2139049 | Allele | A | 0.74 (0.61-0.92) | 0.005 | 99.98 | **0.020*** | **0.057*** | 0.399 |
|  | Codominant | AA | 0.21 (0.08-0.52) | 0.001 | 3.04 | **0.068*** | **0.180*** | 0.707 |
|  | Recessive | AA | 0.22 (0.09-0.54) | 0.0002 | 3.66 | **0.072*** | **0.189*** | 0.720 |
|  | Log-additive | --- | 0.73 (0.58-0.91) | 0.005 | 99.96 | **0.015*** | **0.044*** | 0.337 |
| rs6738825 | Allele | G | 0.76 (0.62-0.93) | 0.008 | 100.00 | **0.023*** | **0.065*** | 0.433 |
|  | Codominant | GG | 0.25 (0.11-0.59) | 0.002 | 5.68 | **0.076*** | **0.198*** | 0.730 |
|  | Recessive | GG | 0.27 (0.11-0.62) | 0.001 | 7.31 | **0.048*** | **0.131*** | 0.624 |
|  | Log-additive | --- | 0.74 (0.59-0.93) | 0.009 | 99.96 | **0.029*** | **0.081*** | 0.493 |
| rs2164068 | Allele | A | 0.74 (0.60-0.91) | 0.004 | 99.99 | **0.013*** | **0.037*** | 0.300 |
|  | Codominant | AA | 0.25 (0.11-0.59) | 0.002 | 5.68 | **0.076*** | **0.198*** | 0.730 |
|  | Dominant | TA-AA | 0.77 (0.60-0.99) | 0.044 | 99.96 | **0.111*** | 0.272 | 0.804 |
|  | Recessive | AA | 0.27 (0.12-0.63) | 0.001 | 7.70 | **0.087*** | 0.223 | 0.759 |
|  | Log-additive | --- | 0.73 (0.58-0.91) | 0.005 | 99.96 | **0.015*** | **0.044*** | 0.337 |
| rs2228135 | Allele | G | 1.22 (1.02-1.47) | 0.031 | 100.00 | **0.099*** | 0.248 | 0.783 |
|  | Dominant | GA-GG | 1.32 (1.02-1.69) | 0.032 | 99.95 | **0.077*** | **0.199*** | 0.733 |
|  | Log-additive | --- | 1.23 (1.02-1.49) | 0.034 | 100.00 | **0.093*** | 0.236 | 0.773 |
| **BMI ≤ 24** |  |  |  |  |  |  |  |  |
| rs2139049 | Allele | A | 0.76 (0.61-0.94) | 0.012 | 99.99 | **0.033*** | **0.093*** | 0.530 |
|  | Codominant | AA | 0.39 (0.19-0.80) | 0.010 | 24.89 | **0.110*** | 0.270 | 0.802 |
|  | Dominant | AG-AA | 0.77 (0.59-0.99) | 0.043 | 99.96 | **0.111*** | 0.272 | 0.804 |
|  | Recessive | AA | 0.43 (0.21-0.86) | 0.013 | 33.49 | **0.132*** | 0.314 | 0.834 |
|  | Log-additive | --- | 0.75 (0.60-0.93) | 0.010 | 99.99 | **0.026*** | **0.073*** | 0.465 |
| rs6738825 | Allele | G | 0.75 (0.61-0.93) | 0.010 | 99.99 | **0.026*** | **0.073*** | 0.465 |
|  | Codominant | GG | 0.36 (0.17-0.74) | 0.006 | 18.58 | **0.081*** | 0.209 | 0.744 |
|  | Dominant | GA-GG | 0.77 (0.59-0.99) | 0.043 | 99.96 | **0.111*** | 0.272 | 0.804 |
|  | Recessive | GG | 0.39 (0.19-0.79) | 0.007 | 24.51 | **0.099*** | 0.247 | 0.783 |
|  | Log-additive | --- | 0.74 (0.59-0.92) | 0.008 | 99.98 | **0.020*** | **0.057*** | 0.399 |
| rs2164068 | Allele | A | 0.76 (0.61-0.94) | 0.011 | 99.99 | **0.033*** | **0.093*** | 0.530 |
|  | Codominant | AA | 0.34 (0.16-0.69) | 0.003 | 14.28 | **0.056*** | **0.151*** | 0.661 |
|  | Recessive | AA | 0.36 (0.18-0.73) | 0.003 | 18.12 | **0.071*** | **0.187*** | 0.716 |
|  | Log-additive | --- | 0.74 (0.59-0.93) | 0.009 | 99.96 | **0.029*** | **0.081*** | 0.493 |
| **Blown-sand region** |  |  |  |  |  |  |  |  |
| rs2139049 | Allele | A | 0.65 (0.48-0.86) | 0.003 | 96.69 | **0.008*** | **0.023*** | 0.208 |
|  | Codominant | AA | 0.06 (0.01-0.43) | 0.006 | 1.74 | 0.468 | 0.725 | 0.967 |
|  | Dominant | AG-AA | 0.66 (0.46-0.93) | 0.019 | 94.37 | **0.053*** | **0.143*** | 0.648 |
|  | Recessive | AA | 0.06 (0.01-0.49) | 0.0001 | 2.39 | 0.520 | 0.765 | 0.973 |
|  | Log-additive | --- | 0.60 (0.43-0.82) | 0.001 | 87.37 | **0.005*** | **0.014*** | **0.133*** |
| rs6738825 | Allele | G | 0.67 (0.50-0.90) | 0.007 | 97.40 | **0.024*** | **0.067*** | 0.443 |
|  | Codominant | GG | 0.06 (0.01-0.45) | 0.006 | 1.96 | 0.487 | 0.740 | 0.969 |
|  | Recessive | GG | 0.06 (0.01-0.49) | 0.0001 | 2.39 | 0.520 | 0.765 | 0.973 |
|  | Log-additive | --- | 0.64 (0.46-0.87) | 0.005 | 94.25 | **0.014*** | **0.040*** | 0.315 |
| rs2164068 | Allele | A | 0.65 (0.48-0.87) | 0.003 | 96.11 | **0.012*** | **0.034*** | 0.280 |
|  | Log-additive | --- | 0.60 (0.43-0.83) | 0.002 | 86.46 | **0.007*** | **0.021*** | 0.189 |

FPRP: false-positive report probability.

a Statistical power was calculated using the number of observations in the subgroup and the OR and *p* values in this table.

* The level of false-positive report probability threshold was set at 0.2; ‘*’ and bold text indicate noteworthy findings.
